# Supplementary material
Source: publisher figshare collection journal article supplement (https://tandf.figshare.com/ndownloader/files/17588462)
Supplement: Supplementary file 1 [file 17588462]

We report measurements of equilibrium polarizability anisotropy for atmospheric
molecular oxygen and nitrogen and provide a theoretical underpinning. Our measurements substantially improve on the accuracy of previous experimental data due to large signals provided by a multi-pass cell. For nitrogen, our results agree with previously reported values, while for oxygen, are significantly different.
These results have implications for improving the accuracy of atmospheric temperature measurements using  rotational Raman lidar.
